# Supplementary material
Source: PubMed Central journal article supplement (PMC5058437)
Supplement: NIHMS69667-supplement-NG-A42239R_Supplementary_Files_JT.pdf [file NIHMS69667-supplement-NG-A42239R_Supplementary_Files_JT.pdf]

Supplementary Figure 1

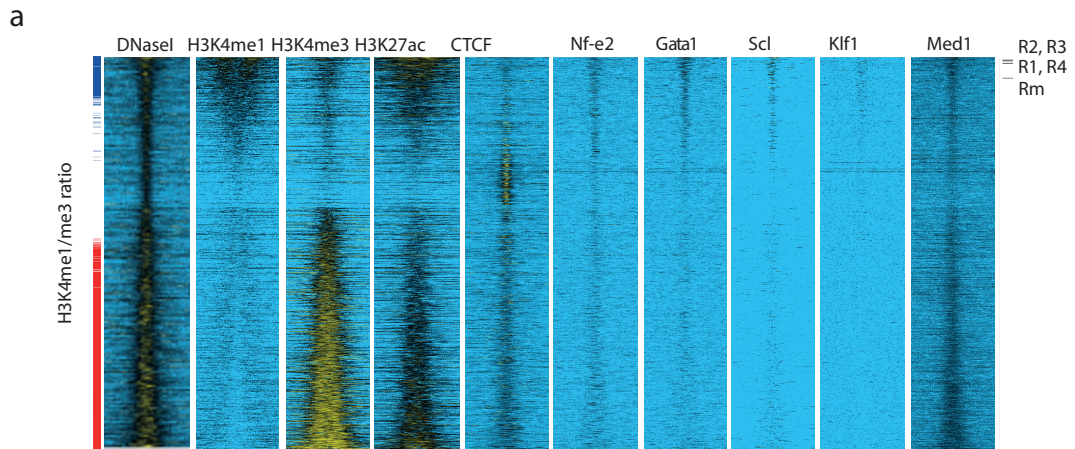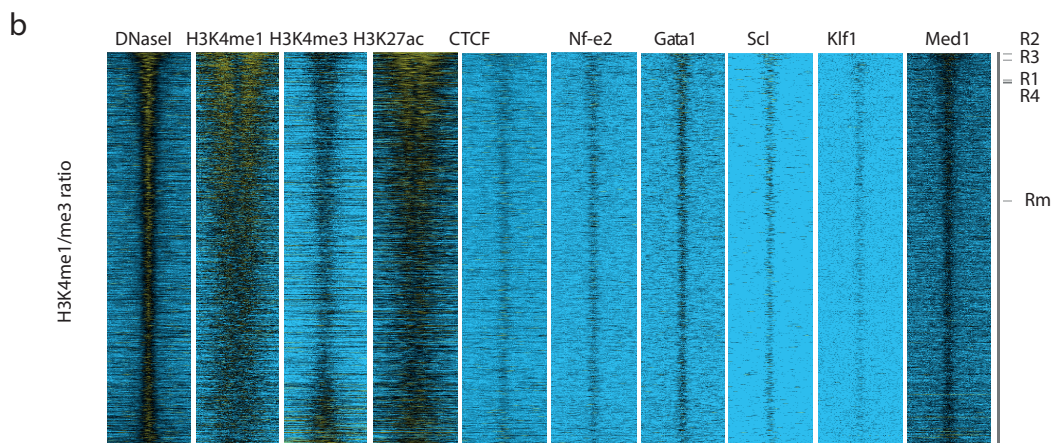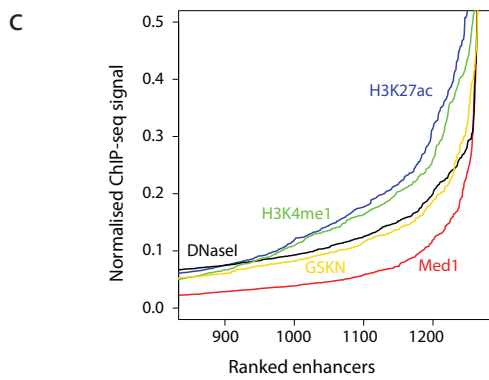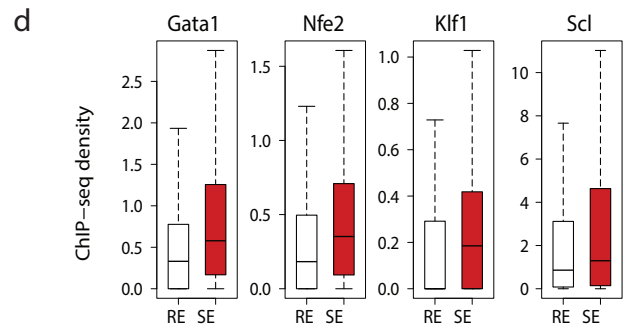

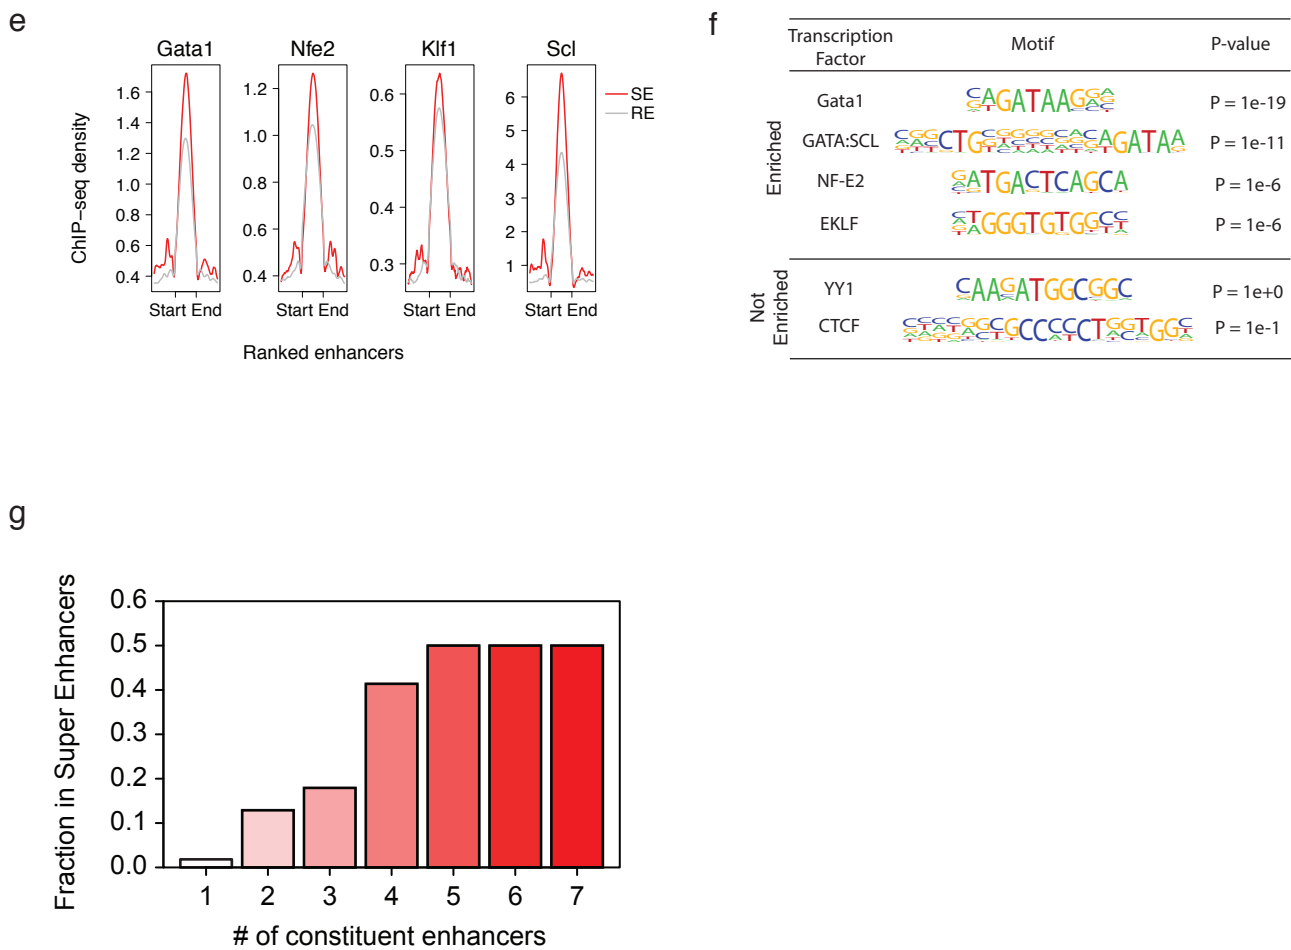

### Supplementary Figure 1

a. Heatmap showing log-scaled DNase I-seq and ChIP-seq signal +/- 2kb around the DNaseI peak call regions (15849 peaks), sorted by ratio of H3K4me1 to H3K4me3. In the side panes the annotated "putative enhancers" are marked blue, and "putative promoters" marked red. 3665 of the peaks show strong signal in the CTCF ChIP (annotated as CTCF sites for the PAM clustering analysis). The positions of  $\alpha$ -globin regulatory elements are indicated. b. As panel a, but focused +/- 2kb around the enhancer regions only (1963 peaks). c. Normalized distribution of DNaseI hypersensitivity, Med1, H3K27ac, H3K4me1, and GSKN (Gata1, Scl, Klf1, Nf-e2) ChIP-seq signal across 1268 stitched erythroid enhancers. Enhancers are ranked for the plotted feature and divided by the maximum detected input-subtracted ChIP-seq signal. The axes are scaled so that differences between different features can be observed. d. Box plots for the normalized ChIP-seq density (input-subtracted reads per base-pair per million) of Gata1, Scl, Klf1 and Nf-e2 at constituent enhancers of regular and super-enhancers. Transcription factor occupancy was significantly different between constituents of regular and super-enhancers by two-tailed t-test (Gata1:  $p = 4.378772e-07$ , Scl:  $p = 5.972195e-4$ , Klf1:  $p = 9.76816e-4$ , Nf-e2:  $p = 4.649954e-03$ ) e. Average distribution of transcription factor (Gata1, Scl, Klf1 and Nf-e2) ChIP-seq signal (reads per base-pair per million) across constituents of regular and super-enhancers and a flanking region of 2kb. f. The binding motifs for key erythroid transcription factor are enriched at erythroid super-enhancers. g. The fraction of stitched enhancers that fall into the super-enhancer category as a function of the number of constituents present in the stitched enhancer region.

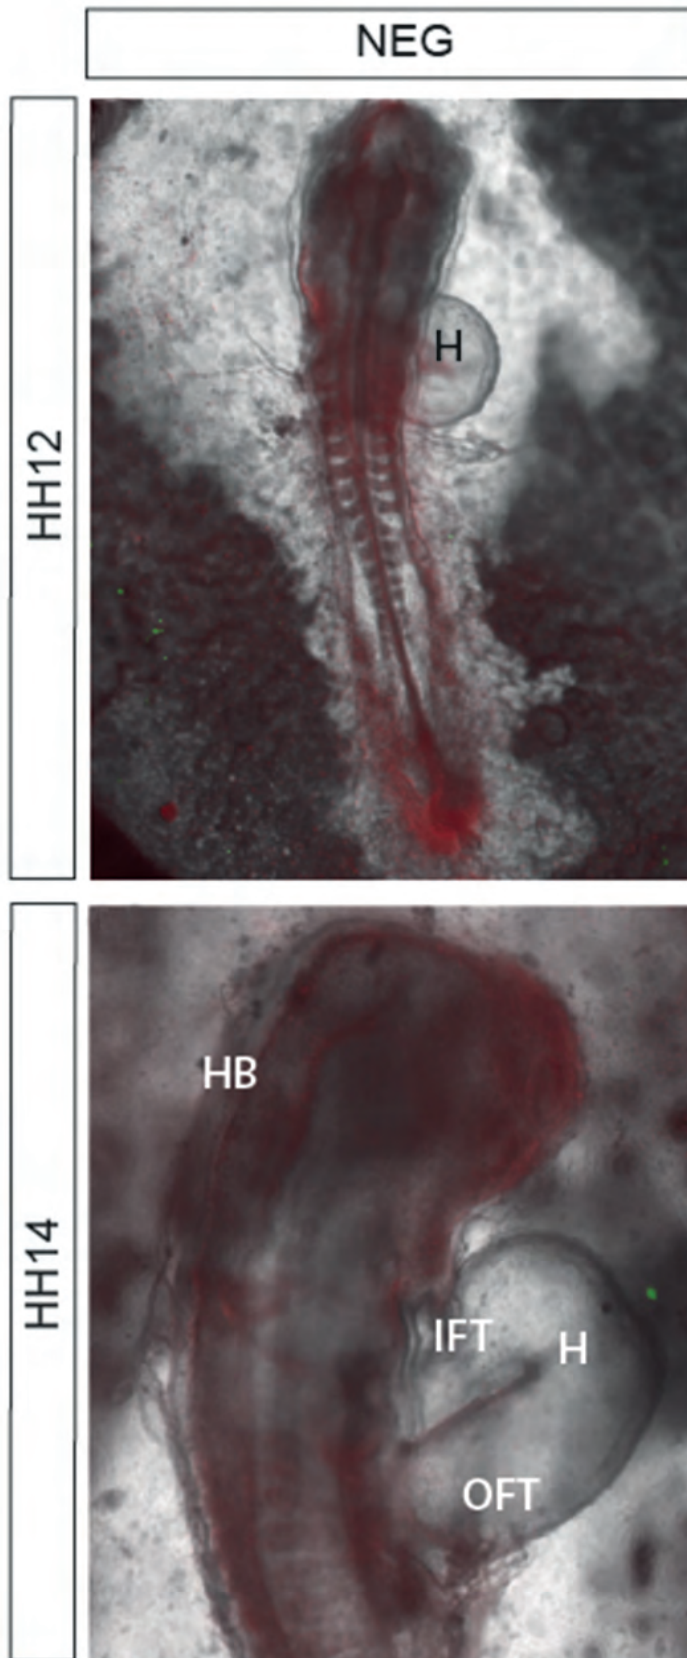

**Supplementary Figure 2.**

Negative controls (construct without enhancer sequence) for the enhancer assay in chick embryonic development, taken at HH12 and HH14. (IFT inflow tract; OFT, outflow tract; H, heart; HB, hind-brain).

**Supplementary Figure 2b (movie)**

R1 enhancer activity in circulating blood cells, captured using a Red Epic camera attached to Olympus MVX10 microscope, recorded at 240 frames per second at 1280 iso, 20X magnification.

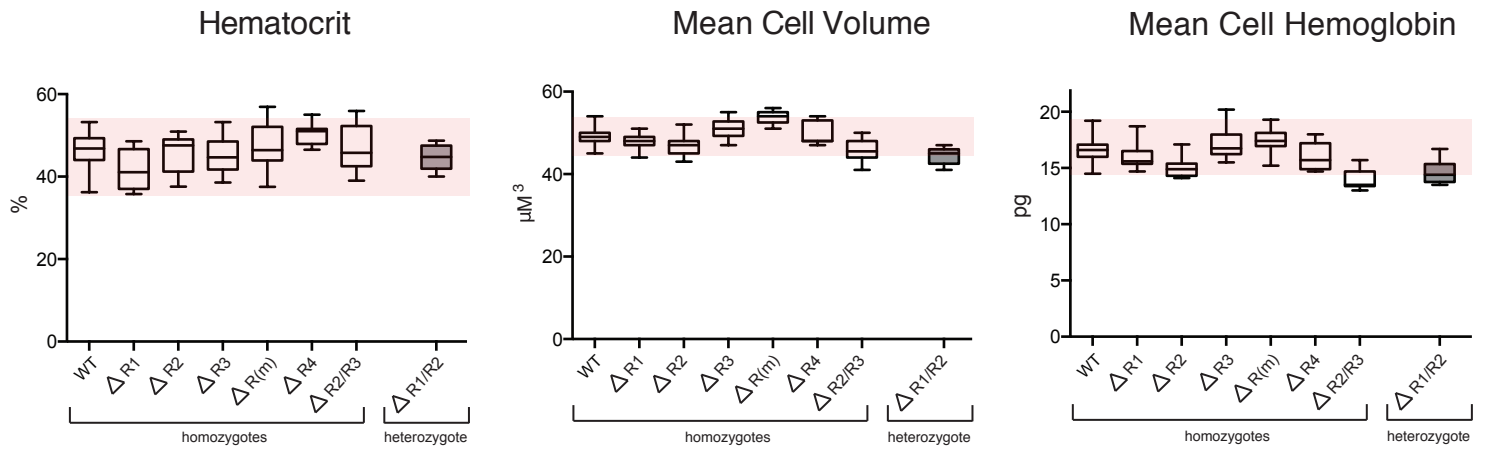

### Supplementary Figure 3

Hematological parameters for mice homozygous for single enhancer deletions and the R2/R3 deletion. Mean values for hematocrit, mean red cell volume and mean cell hemoglobin remain within normal limits for all homozygotes, though with a non-significant trend towards hypochromic red cells for the  $\Delta R2$  homozygotes as previously described (Anguita et al. 2002), and for the  $\Delta R2/R3$  homozygotes.

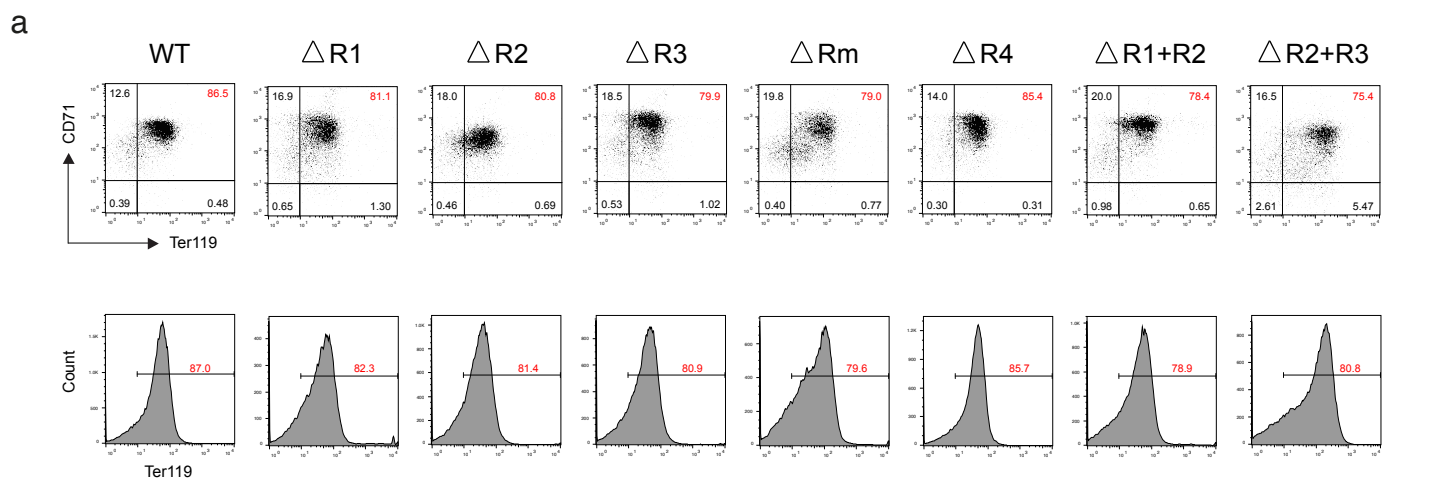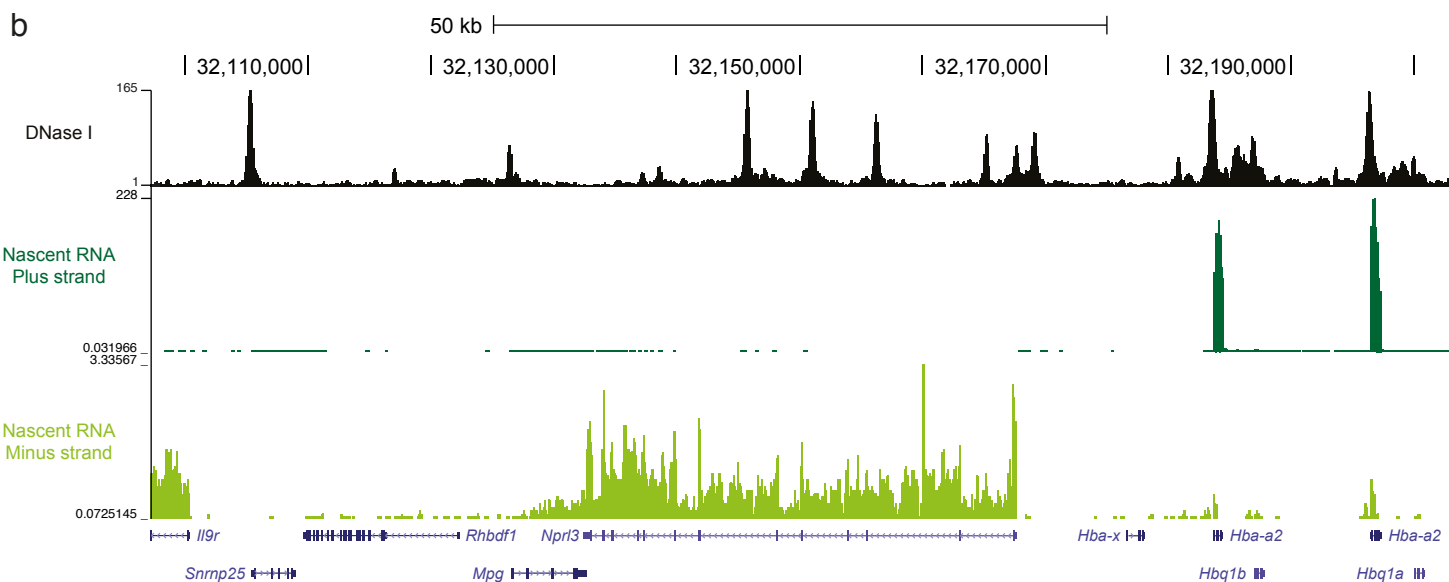

### Supplementary Figure 4

**a.** FACS analysis of fetal liver cultures from wild type and enhancer knockout mice at E12.5. Cells from WT and knockout mice show a similar pattern of expression of the surface markers CD71 and Ter119, used to define late stage erythroblasts.

**b.** Strand specific Nascent RNA-seq at the  $\alpha$  globin locus, used to validate the nascent RNA collection protocol. Data are as for figure 5D, but now auto-scaled to expression of the  $\alpha$  globin genes

a

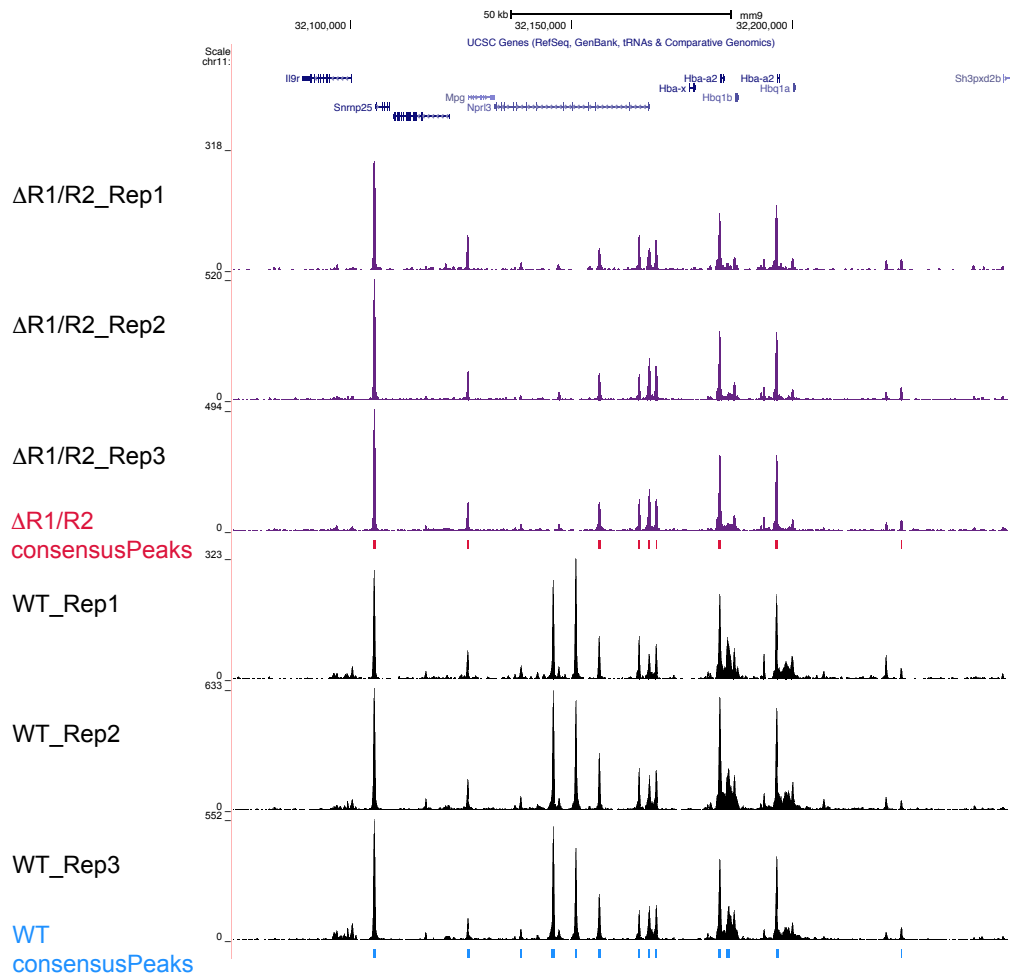

b

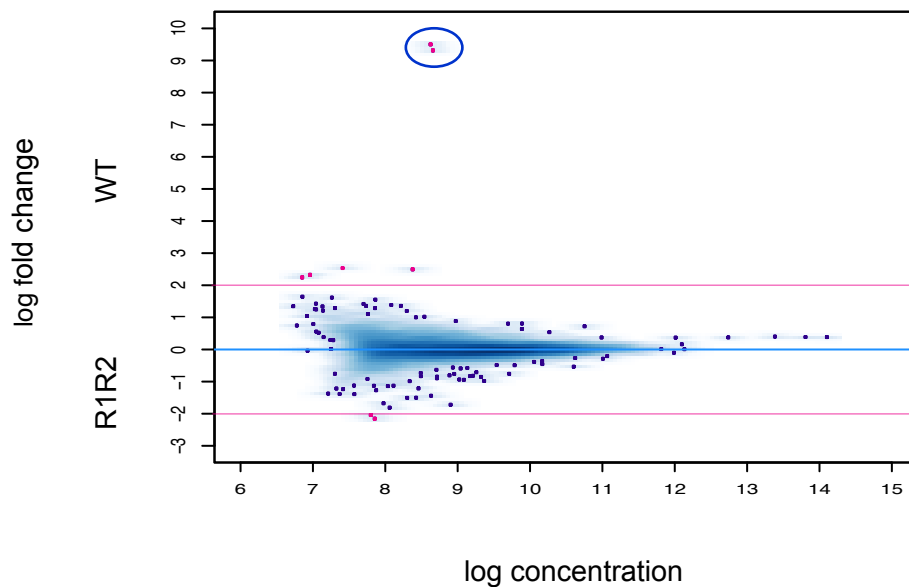

**Supplementary Figure 5.**

**a.** ATAC-seq in  $\Delta R1/R2$  and WT erythroid cells visualized in the UCSC browser, the consensus peak call from wild type cells used for signal quantification is shown below as blue boxes.

**b.** MAplot showing significant differential sites genome-wide (FDR <0.01 and fold change >2) highlighted in red. The signals corresponding to the R1 and R2 elements, absent from the knockout models are circled in blue.



a. Alpha globin (Hba-a1&2)

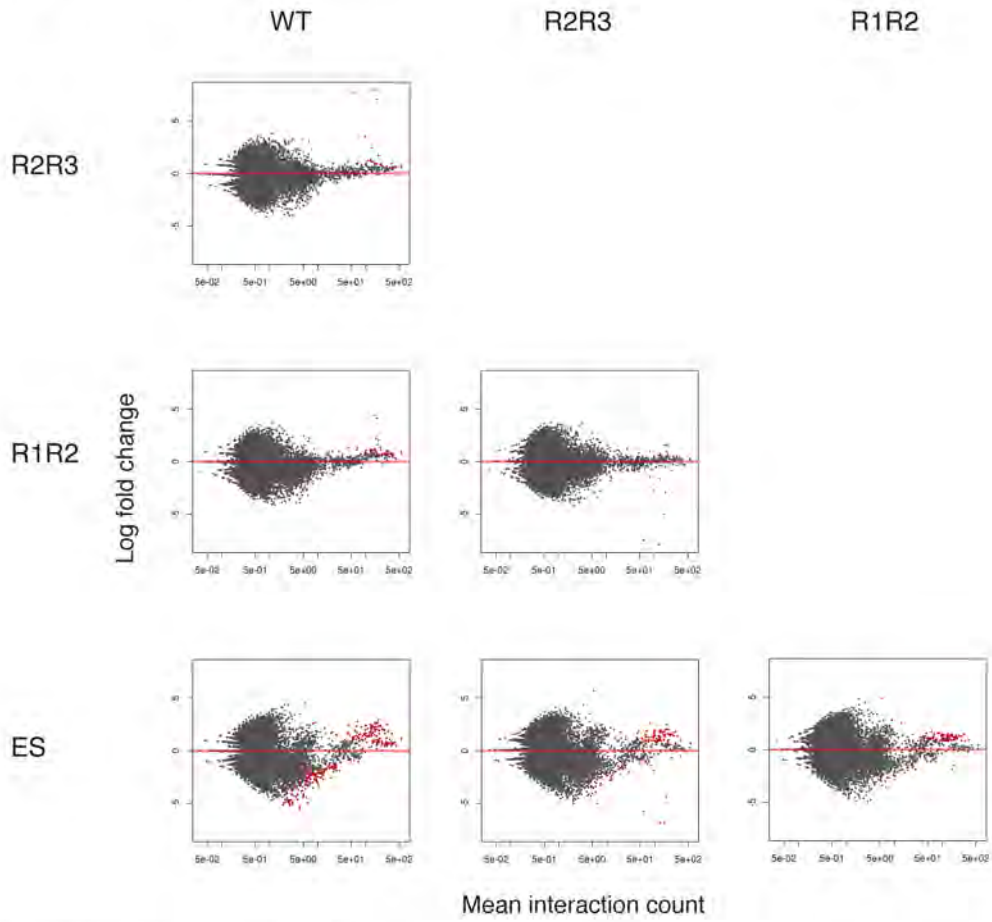

b. Beta globin (Hbb-a1&2)

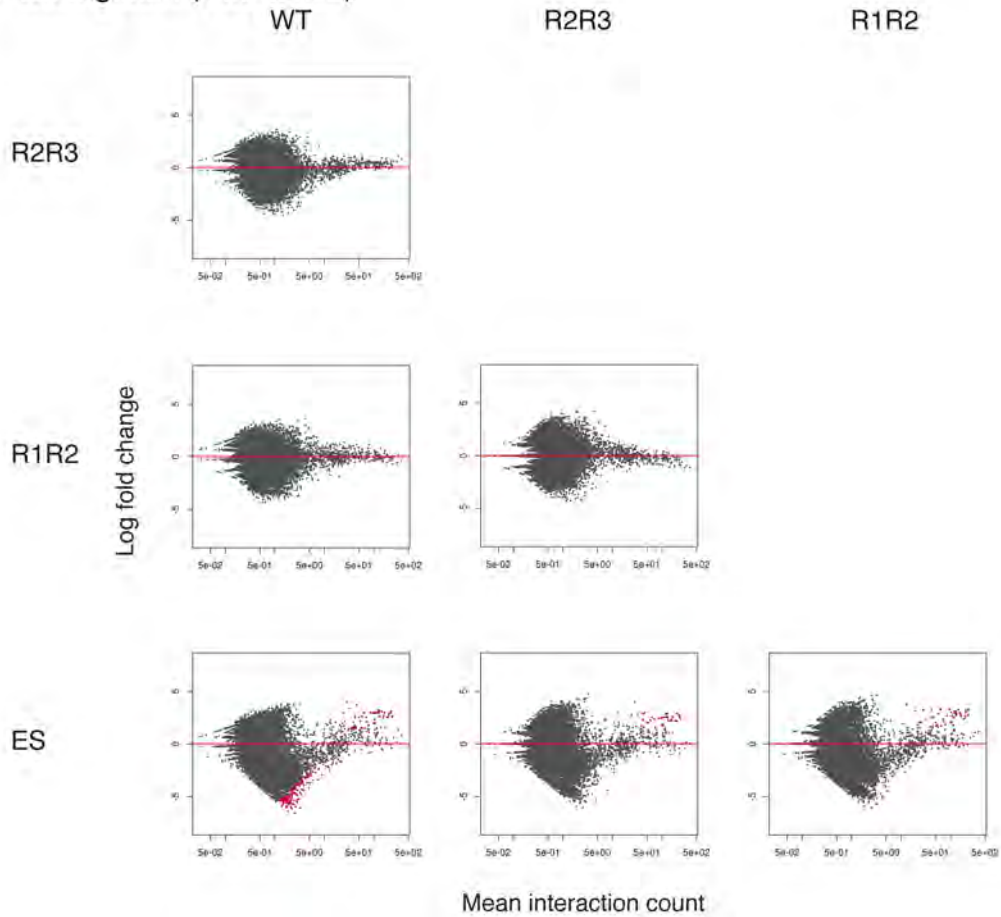



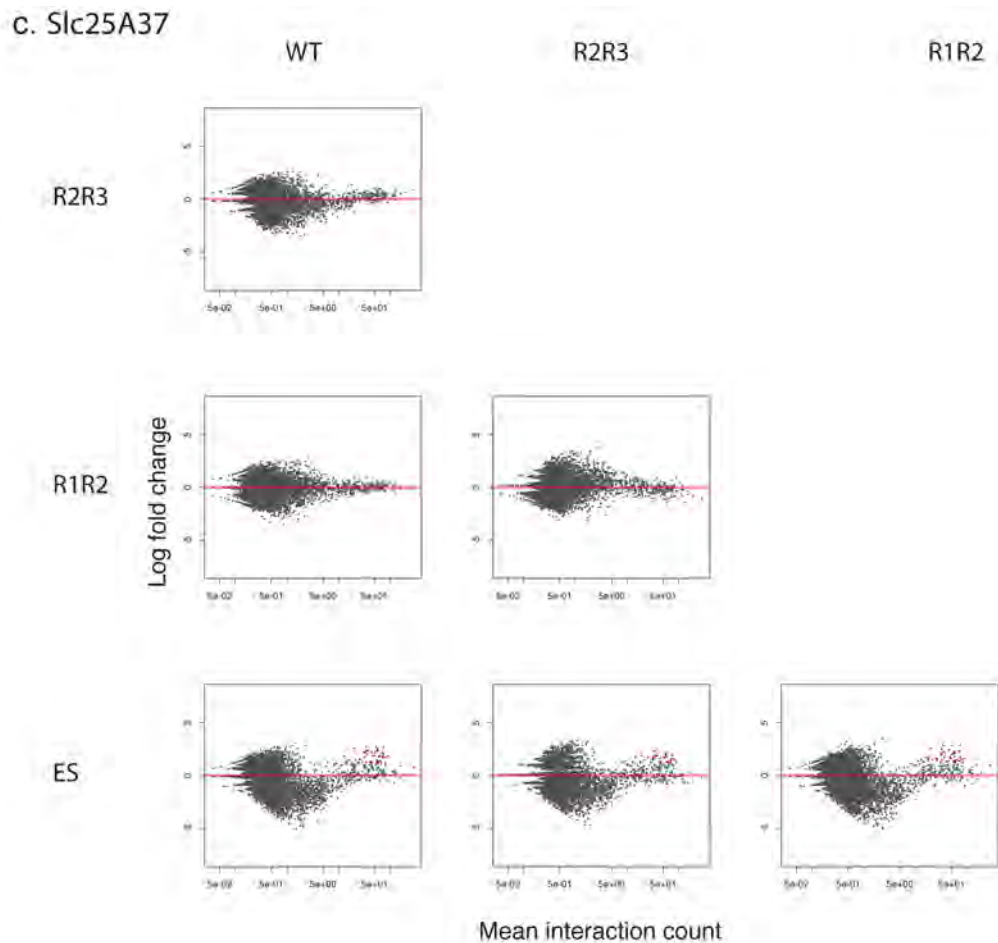

### Supplementary Figure 7

Next generation Capture-C was performed from the promoters of *Hba-a1&2*, *Hbb-b1&2* and *Slc25a37* in WT fetal liver,  $\Delta R1/R2$  and  $\Delta R2/R3$  double knockout cells from three biological replicate of each cell type. DESeq2 was used to compare the number of interactions with the capture points (promoters) per Dpn II restriction fragment genome-wide for the  $\Delta R1/R2$  and  $\Delta R2/R3$  models in erythroid cells and in WT ES cell non-erythroid controls (Davies et al Nature Methods doi: 10.1038/nmeth.3664). The results are presented as comparison matrices for the  $\alpha$  globin, the  $\beta$  globin and the *Slc25a37* loci captured in the same reaction as internal controls for comparability. Statistically different interactions are shown in red with above the midline representing an increase in interactions and below a decrease. Panel a, shows the comparison matrix of these analyses for the  $\alpha$  globin locus. The top line of the matrix shows the comparison of the NG Capture-C analysis of the interactions of the *Hba-a1&2* promoters in the double deletion of the R2 and R3 elements ( $\Delta R2/R3$ ) against wild type (WT). The second line shows the comparison between the double deletion of the R1 and R2 elements ( $\Delta R1/R2$ ) against WT and  $\Delta R2/R3$ . The third line shows the comparison of the non-erythroid control cell type (mES) against WT,  $\Delta R2/R3$  and  $\Delta R1/R2$ . The same comparisons are performed from the point of view of the promoters of the two control loci in panels b and c, *Hbb-b1&2* and *Slc25a37* respectively.

**Supplementary Table 1:  $\alpha$ - and  $\beta$ -globin rank as strong super-enhancers in erythroid cells**

| Factor  | $\alpha$ -globin regulatory region total reads | $\alpha$ -globin regulatory region relative signal | $\alpha$ -globin regulatory region rank | Classified as Super-enhancer? |
|---------|------------------------------------------------|----------------------------------------------------|-----------------------------------------|-------------------------------|
| Med1    | 2812                                           | 0.87                                               | 2                                       | YES                           |
| DNaseI  | 20309                                          | 0.67                                               | 2                                       | YES                           |
| H3K4me1 | 83839                                          | 1                                                  | 1                                       | YES                           |
| H3K27ac | 56746                                          | 0.81                                               | 8                                       | YES                           |
| GSKN    | 6186                                           | 1                                                  | 1                                       | YES                           |

  

| Factor  | $\beta$ -globin LCR total reads | $\beta$ -globin LCR relative signal | $\beta$ -globin LCR rank | Classified as Super-enhancer? |
|---------|---------------------------------|-------------------------------------|--------------------------|-------------------------------|
| Med1    | 3219                            | 1                                   | 1                        | YES                           |
| DNaseI  | 12991                           | 0.43                                | 8                        | YES                           |
| H3K4me1 | 42850                           | 0.51                                | 11                       | YES                           |
| H3K27ac | 31676                           | 0.45                                | 31                       | YES                           |
| GSKN    | 3626                            | 0.59                                | 4                        | YES                           |

**Supplementary Table 2: transcription factors present in individual enhancers**

| Cluster no. | MED1 | NFE2 | GATA1 | SCL | KLF | CTCF | # factors |
|-------------|------|------|-------|-----|-----|------|-----------|
| 1           | +++  | X    | X     | X   | X   | X    | 5         |
| 2           | +++  | X    | X     | X   | X   |      | 4         |
| 3           | ++   | X    | X     |     | X   |      | 3         |
| 4           | ++   |      | X     | X   | X   |      | 3         |
| 5           | ++   | X    | X     | X   |     |      | 3         |
| 6           | +    | X    | X     |     |     |      | 2         |
| 7           | +    |      | X     |     |     | X    | 2         |
| 8           | +    | X    |       |     |     | X    | 2         |
| 9           | +    |      | X     |     | X   |      | 2         |
| 10          | +    | X    |       |     | X   |      | 2         |
| 11          | +    |      | X     | X   |     |      | 2         |
| 12          | +    |      |       | X   | X   |      | 2         |
| 13          | (+)  |      | X     |     |     |      | 1         |
| 14          | (+)  |      |       |     | X   |      | 1         |
| 15          | -    | X    |       |     |     |      | 1         |
| 16          | -    |      |       | X   |     |      | 1         |
| 17          | -    |      |       |     |     | X    | 1         |
| 0           | -    |      |       |     |     |      | 0         |

**Supplementary Table 3. Summary of transgenic enhancer testing in mouse and chick**

|         |                            | Mouse embryos                                             |                                                                                | Chick embryos                                    |                                                                 |
|---------|----------------------------|-----------------------------------------------------------|--------------------------------------------------------------------------------|--------------------------------------------------|-----------------------------------------------------------------|
| Element | Genomic coordinates in Mm9 | Total number of embryos with LacZ activity <sup>(1)</sup> | Staining consistent with enhancer activity during hematopoiesis <sup>(2)</sup> | Total number of embryos showing Citrine activity | Staining consistent with enhancer activity during hematopoiesis |
| R1      | chr11:32145540-32146033 bp | 5                                                         | Yes                                                                            | 16 (100%)                                        | Yes                                                             |
| R2      | chr11:32150804-32151369 bp | 7                                                         | Yes                                                                            | 21 (100%)                                        | Yes                                                             |
| R3      | chr11:32156068-32156646 bp | 5                                                         | No                                                                             | 18 (100%)                                        | Yes                                                             |
| Rm      | chr11:32165216-32165550 bp | 4                                                         | No                                                                             | 11 (100%)                                        | Yes                                                             |
| R4      | chr11:32168944-32169344 bp | 6                                                         | No                                                                             | 20 (100%)                                        | Yes                                                             |

1. Figures in this column refer to the number of embryos obtained showing any LacZ staining.
2. Enhancer elements were scored as having activity during hematopoiesis if LacZ staining was visualized in hematopoietic cells following tissue sectioning.

### Supplementary Table 4

a. Litter size from Heterozygote x Heterozygote crosses

| Model          | $\Delta R1$ | $\Delta R2$ | $\Delta R3$ | $\Delta R(m)$ | $\Delta R4$ | $\Delta R1+\Delta R2$ | $\Delta R2+\Delta R3$ |
|----------------|-------------|-------------|-------------|---------------|-------------|-----------------------|-----------------------|
| Number of pups | 7.0         | 7.5         | 8.0         | 11            | 7.5         | 5.3                   | 6.5                   |

b. Percentage Homozygotes, Heterozygotes and WT mice in litters from Heterozygote x Heterozygote crosses

|               | $\Delta R1$ | $\Delta R2$ | $\Delta R3$ | $\Delta R(m)$ | $\Delta R4$ | $\Delta R1+\Delta R2$ | $\Delta R2+\Delta R3$ |
|---------------|-------------|-------------|-------------|---------------|-------------|-----------------------|-----------------------|
| WT            | 28          | 18          | 25          | 18            | 14          | 23                    | 31                    |
| Heterozygotes | 43          | 53          | 25          | 55            | 33          | 77                    | 31                    |
| Homozygotes   | 28          | 29          | 50          | 27            | 53          | 0                     | 38                    |
| $\chi^2$      | 0.143       | 0.857       | 6.000       | 0.273         | 6.467       | 10.700                | 2.077                 |
| <i>P</i>      | 0.9311      | 0.6514      | 0.0498      | 0.8725        | 0.0394      | 0.0047                | 0.3540                |

c. Percentage Homozygotes and Heterozygotes in litters from Heterozygote x Homozygote crosses

|               | $\Delta R1$ | $\Delta R3$ | $\Delta R(m)$ | $\Delta R4$ |
|---------------|-------------|-------------|---------------|-------------|
| Heterozygotes | 61          | 62          | 50            | 46          |
| Homozygotes   | 39          | 38          | 50            | 54          |
| $\chi^2$      | 0.692       | 0.500       | 0.000         | 0.077       |
| <i>P</i>      | 0.4054      | 0.4795      | 1.000         | 0.7815      |

d. Percentage Homozygotes, Heterozygotes and WT mice in litters from  $\Delta R1/\Delta R2$  Heterozygote x Heterozygote crosses

|               | $\Delta R1/\Delta R2$ – term litters | $\Delta R1/\Delta R2$ – in litters at 12.5 dpc |
|---------------|--------------------------------------|------------------------------------------------|
| WT            | 23                                   | 30                                             |
| Heterozygotes | 77                                   | 48                                             |
| Homozygotes   | 0                                    | 22                                             |
| $\chi^2$      | 10.700                               | 0.333                                          |
| <i>P</i>      | 0.0047                               | 0.8465                                         |



## Legends to Supplementary Tables

### **Supplementary Table 1.**

Ranks of the  $\alpha$ - and  $\beta$ -globin regulatory regions in the super-enhancer ranking for various erythroid master factors associated with enhancer activity (Med1, H3K4me1, H3K27ac, GSKN (Gata1, Scl, Klf1 and Nf-e2), and DNase I). Both input-subtracted read-count over the stitched regions and the relative value (divided by the maximum read-count observed for the factor) are displayed.

### **Supplementary Table 2.**

Table depicting the enrichment of transcription factor binding motifs in super-enhancers over genomic background regions. CTCF motifs are not enriched in super-enhancers.

### **Supplementary Table 3.**

Summary of transgenic enhancer testing, showing coordinates of the enhancer region tested, numbers of embryos assessed and conclusions for both mouse and chick models.

### **Supplementary Table 4.**

- a. Litter sizes from heterozygote breedings for each model.
- b. Observed distribution of wild type, heterozygote and homozygote pups from heterozygote crosses and heterozygote x homozygote crosses of enhancer knockout mice, relative to expected Mendelian ratios. All genotyped by PCR.
- c. Observed genotypes from litters of heterozygote x homozygote crosses for each single enhancer knockout
- d. Observed distribution of wild type, heterozygous and homozygous fetuses from heterozygous crosses of  $\Delta R1/\Delta R2$  knockout mice, when the litter was observed at E12.5.

### **Supplementary Table 5**

Hematologic parameters for adult mice from each knockout model: WT, heterozygote and homozygote littermates were assessed where possible. Blood was collected into heparinized capillary tubes and blood counts were assayed using the Horiba Medical Scil Vet abc Plus+ instrument. Reticulocyte counts were performed manually with Brilliant Cresyl blue staining.
